# Supplementary material for: Highly efficient T-shaped deep-red thermally activated delayed fluorescence emitters: substitution position effect
Source: Royal Society of Chemistry journal article supplement (doi:10.1039/d1cp03144a), 2021-01-01
Supplement: d1cp03144a1.pdf [file d1cp03144a1.pdf]

*Supporting Information for*  
High efficient T-shape deep-red thermally  
activated delayed fluorescence emitter:  
substitution position effect

*Kai Zhang, Jianzhong Fan, Chuan-Kui Wang\*, Lili Lin\**

Shandong Province Key Laboratory of Medical Physics and Image Processing  
Technology, School of Physics and Electronics, Shandong Normal University,  
250014 Jinan, China.

**Corresponding Author**

\* Author to whom correspondence should be addressed.

E-mail: ckwang@sdu.edu.cn and linll@sdu.edu.cn.

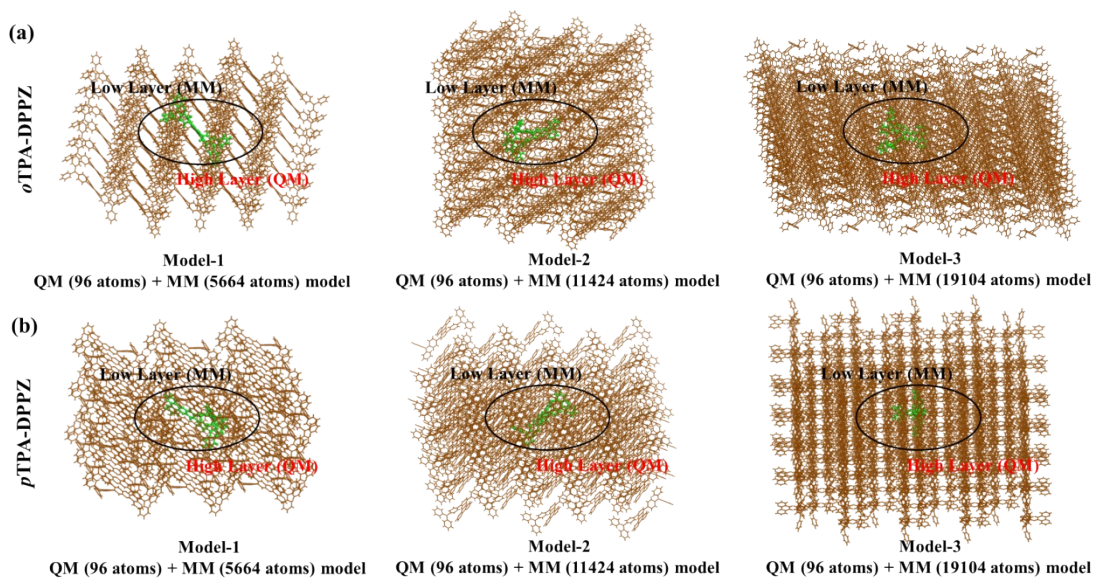

**Figure S1.** ONIOM model to simulate the aggregation in crystal state for *o*TPA-DPPZ (a) and *p*TPA-DPPZ(b). 60 molecular model named as Model-1, 120 molecular model named as Model-2, 200 molecular model named as Model-3.

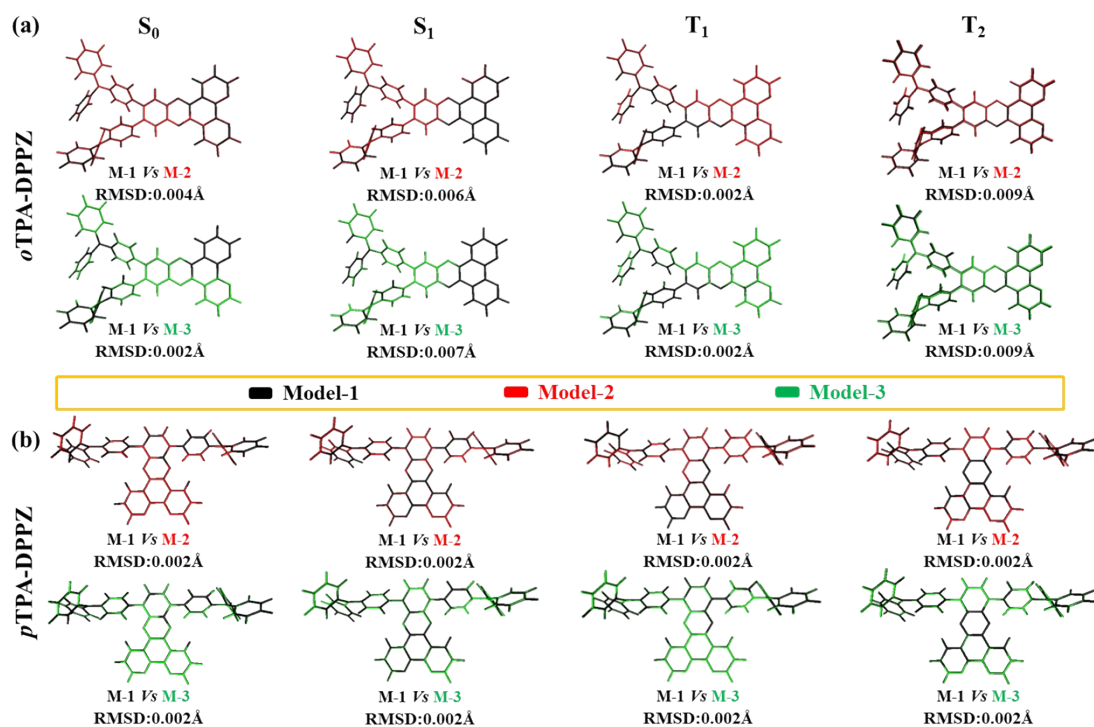

**Figure S2.** Geometry comparisons between of OTPA-DPPZ and pTPA-DPPZ in Model-1 (black), Model-2 (red) and Model-3 (green).

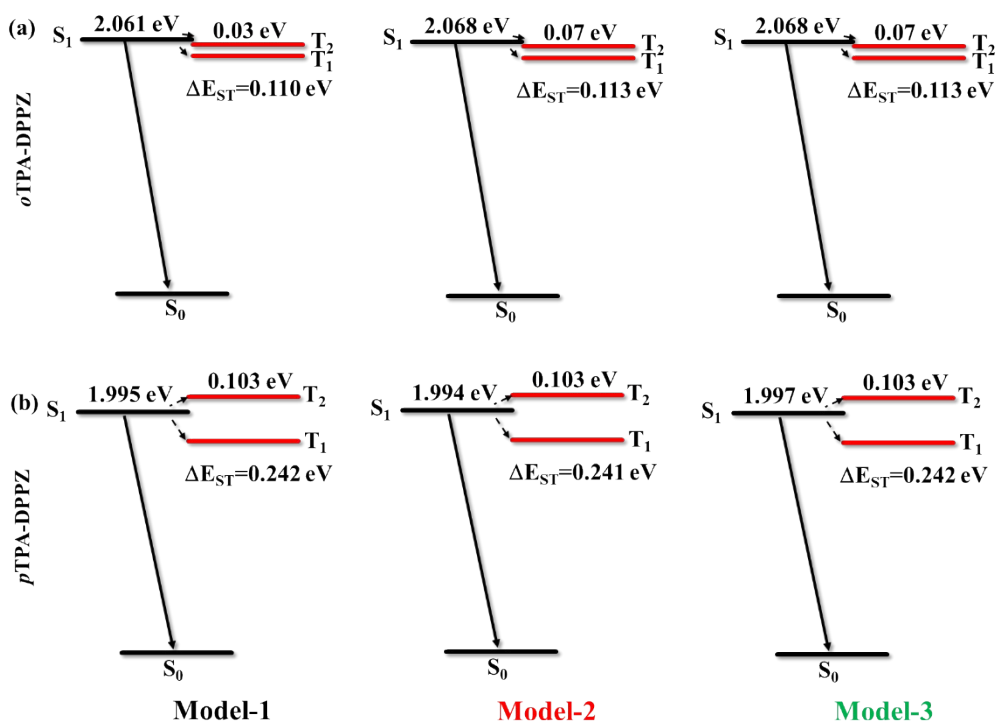

**Figure S3.** Adiabatic excitation energies for *o*TPA-DPPZ and *p*TPA-DPPZ in Model-1, Model-2 and Model-3.

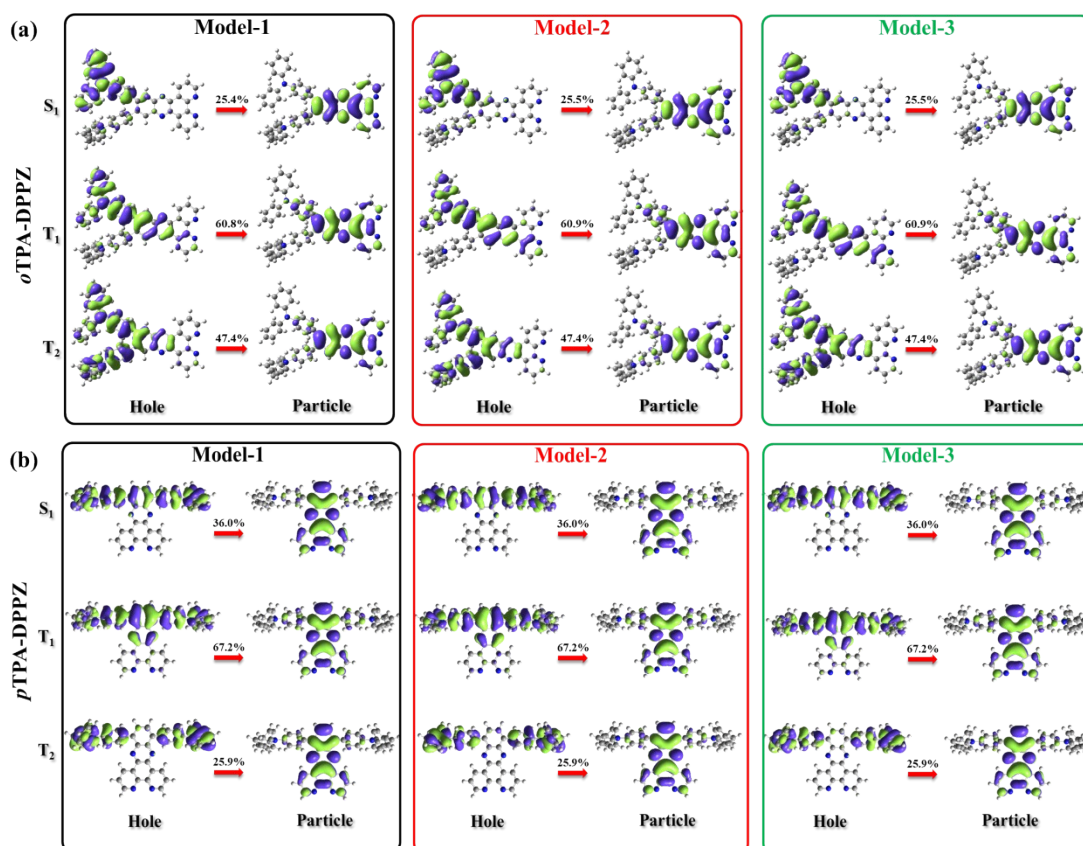

**Figure S4.** Transition characteristics of *o*TPA-DPPZ and *p*TPA-DPPZ in Model-1, Model-2 and Model-3.

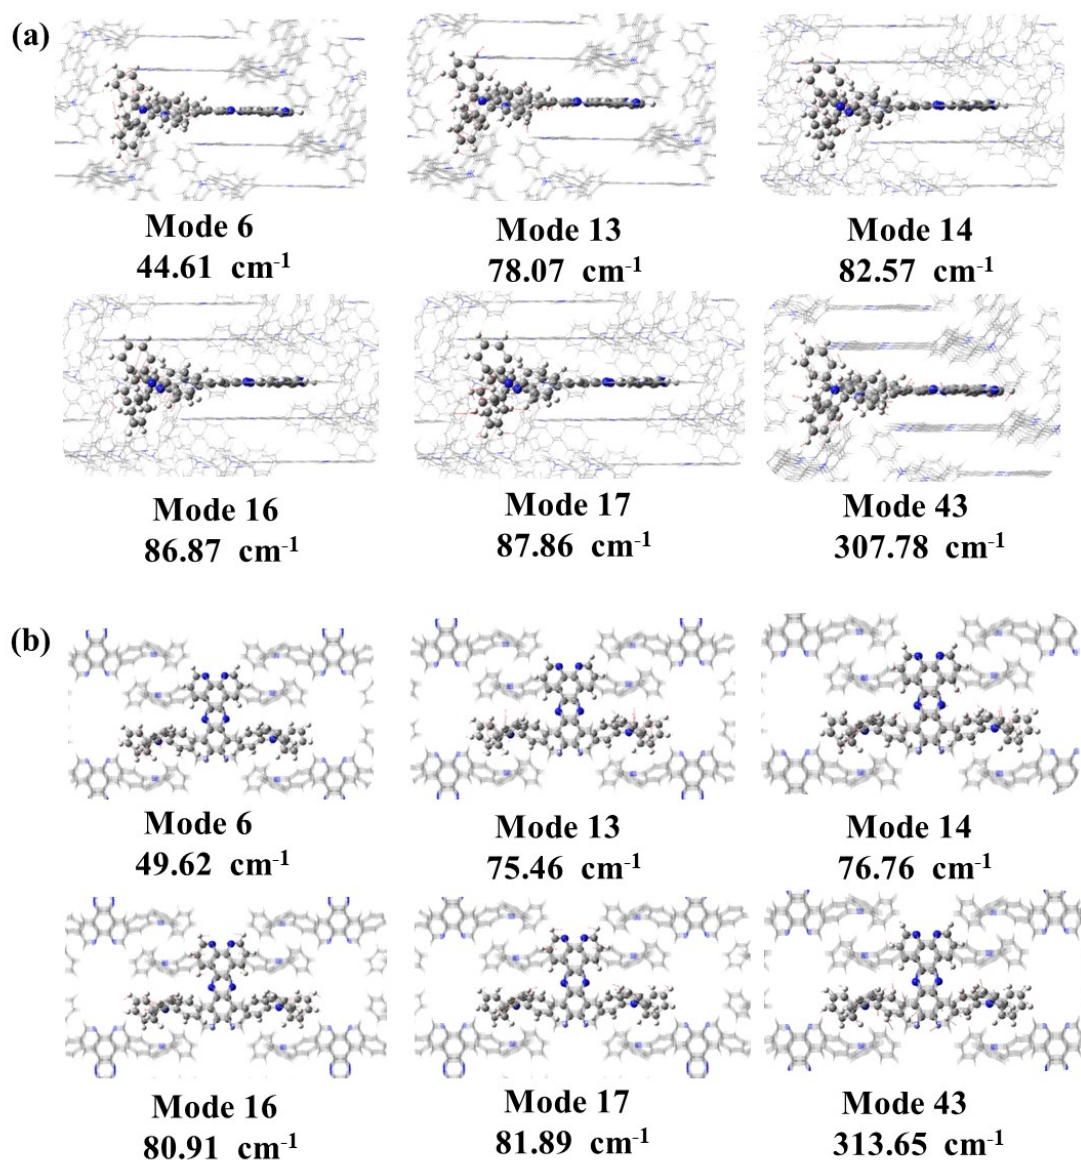

**Figure S5.** Diagrammatic illustration of selected normal modes with large reorganization energies ( $\lambda$ ) for  $S_0$  of *o*TPA-DPPZ (a) and *p*TPA-DPPZ (b) in crystal.

**Table S1.** The emission wavelength and oscillator strength of *o*TPA-DPPZ and *p*TPA-DPPZ in Model-1, Model-2 and Model-3.

|                            | <i>o</i> TPA-DPPZ |         |         | <i>p</i> TPA-DPPZ |         |         |
|----------------------------|-------------------|---------|---------|-------------------|---------|---------|
|                            | Model-1           | Model-2 | Model-3 | Model-1           | Model-2 | Model-3 |
| $\lambda_{\text{em}}$ (nm) | 639               | 637     | 637     | 669               | 670     | 669     |
| $f$                        | 0.105             | 0.106   | 0.106   | 0.144             | 0.144   | 0.144   |

**Table S2.** Calculated SOC constants and transition dipole moments, radiative ( $K_{rt}$ ) and non-radiative rates ( $K_{nrt}$ ) from  $T_1$  to  $S_0$ .

|                         |           | SOC<br>( $\text{cm}^{-1}$ ) | $\mu$<br>(Debye)      | $K_{rt}$<br>( $\text{s}^{-1}$ ) | $K_{nrt}$<br>( $\text{s}^{-1}$ ) |
|-------------------------|-----------|-----------------------------|-----------------------|---------------------------------|----------------------------------|
| <b><i>o</i>TPA-DPPZ</b> | $T_1-S_0$ | 0.437                       | $1.92 \times 10^{-4}$ | $3.01 \times 10^{-2}$           | $5.62 \times 10^0$               |
| <b><i>p</i>TPA-DPPZ</b> | $T_1-S_0$ | 0.472                       | $2.32 \times 10^{-4}$ | $2.74 \times 10^{-2}$           | $4.56 \times 10^2$               |

**Table S3.** Frequencies of each mode  $\omega_j$ , normal-mode displacement ( $\Delta Q$ ), Huang-Rhys factors ( $S_j$ ) and reorganization energy ( $\lambda$ ) for  $S_0$  of *o*TPA-DPPZ and *p*TPA-DPPZ in crystal.

| <b><i>o</i>TPA-DPPZ</b> |                            |            |       |                         | <b><i>p</i>TPA-DPPZ</b> |                            |            |       |                         |
|-------------------------|----------------------------|------------|-------|-------------------------|-------------------------|----------------------------|------------|-------|-------------------------|
| mode                    | $\omega_j(\text{cm}^{-1})$ | $\Delta Q$ | $S_j$ | $\lambda_j(\text{meV})$ | mode                    | $\omega_j(\text{cm}^{-1})$ | $\Delta Q$ | $S_j$ | $\lambda_j(\text{meV})$ |
| 6                       | 44.51                      | -94.03     | 0.90  | 39.91                   | 6                       | 49.62                      | -16.75     | 0.03  | 1.57                    |
| 13                      | 78.07                      | -59.31     | 0.63  | 48.84                   | 13                      | 75.46                      | -0.66      | 0.00  | 0.00                    |
| 14                      | 82.57                      | -60.01     | 0.68  | 55.92                   | 14                      | 76.76                      | 0.41       | 0.00  | 0.00                    |
| 16                      | 86.87                      | -45.09     | 0.40  | 34.95                   | 16                      | 80.91                      | -23.57     | 0.10  | 8.29                    |
| 17                      | 87.86                      | 52.23      | 0.55  | 47.98                   | 17                      | 81.89                      | 7.54       | 0.01  | 0.87                    |
| 43                      | 307.78                     | -16.90     | 0.20  | 61.61                   | 43                      | 313.65                     | -5.74      | 0.02  | 7.39                    |
